# Supplementary material for: Ultrafast transverse relaxation exchange NMR spectroscopy
Source: Royal Society of Chemistry journal article supplement (doi:10.1039/d2cp02944h), 2022-01-01
Supplement: d2cp02944h1.pdf [file d2cp02944h1.pdf]

Electronic supplementary information (ESI) for

## Ultrafast transverse relaxation exchange NMR spectroscopy

Md Sharif Ullah,<sup>a‡</sup> Otto Mankinen,<sup>a‡\*</sup> Vladimir V. Zhivonitko<sup>a</sup> and Ville-Veikko Telkki<sup>a\*</sup>

<sup>a</sup> NMR Research Unit, Faculty of Science, University of Oulu, P.O.Box 3000, 90014 Oulu, Finland

\* Corresponding authors

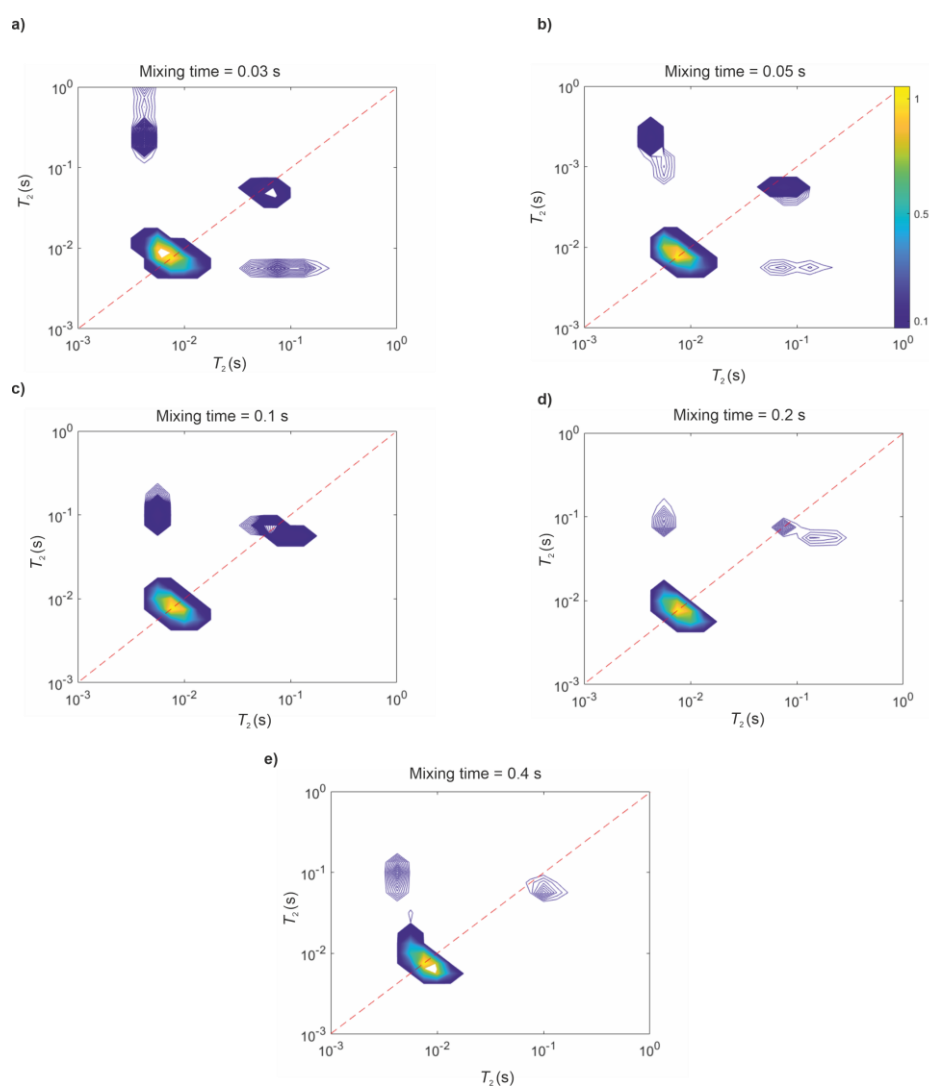

**Fig S1.** UF  $T_2$ - $T_2$  exchange maps resulting from 2D inverse Laplace transform of the raw data measured with mixing times of (a) 30, (b) 50, (c) 100, (d) 200 and (d) 400 ms.

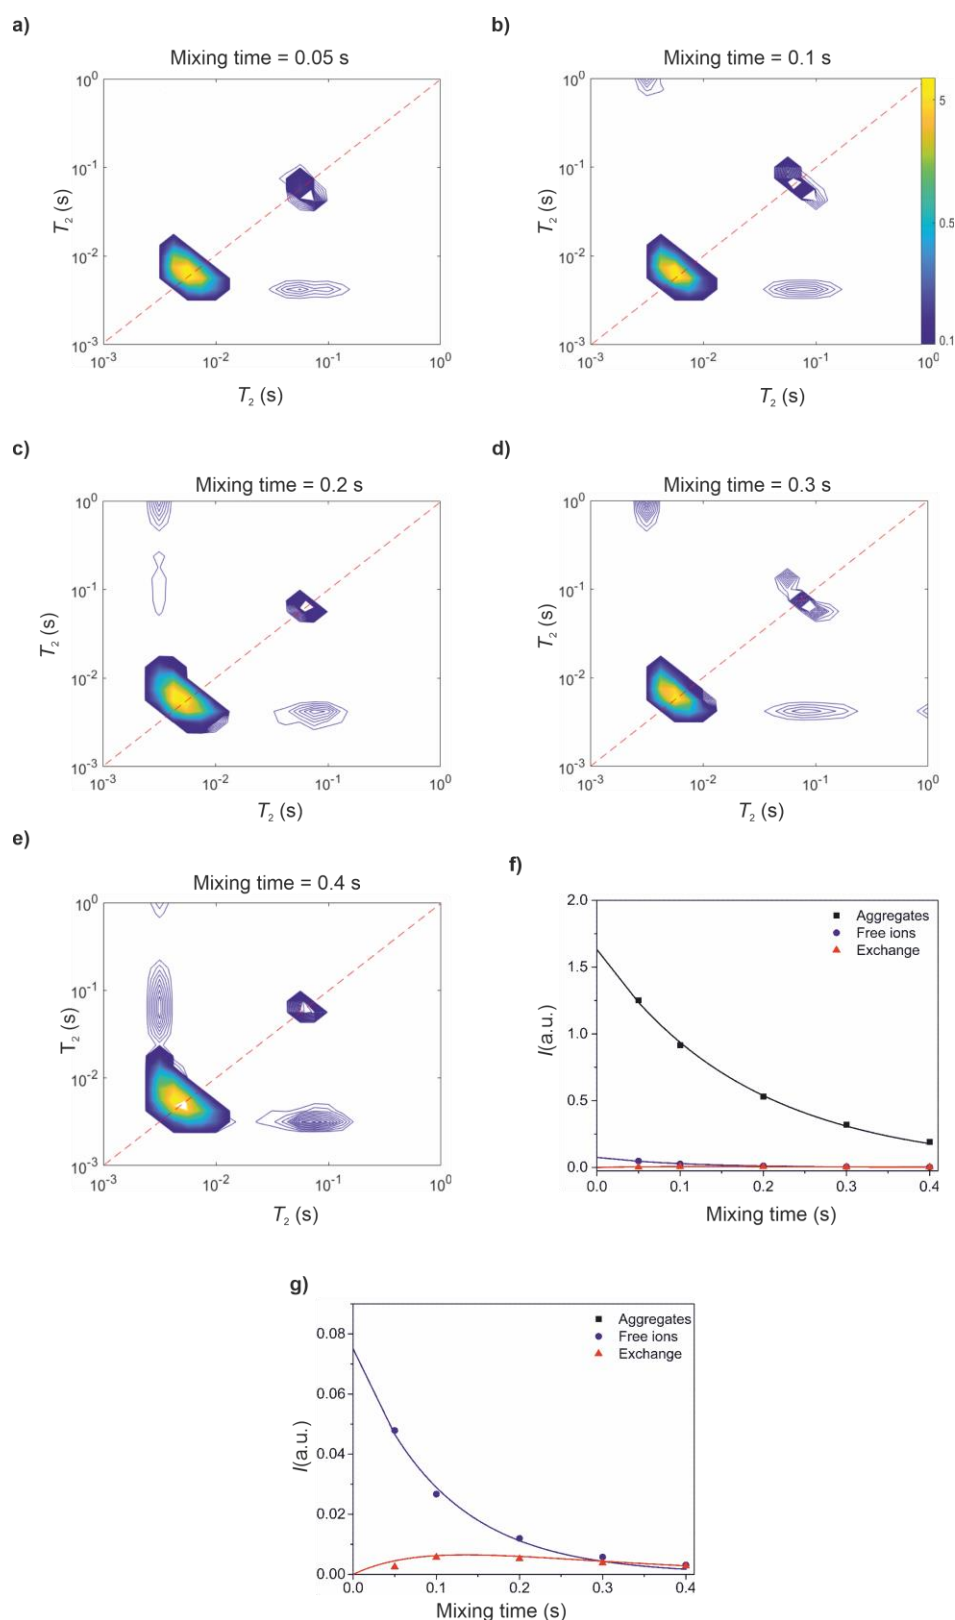

**Fig S2.** Conventional  $T_2$ - $T_2$  analysis of the ionic liquid sample at room temperature. (a-e) Conventional  $T_2$ - $T_2$  exchange maps resulting from 2D inverse Laplace transform of the raw data measured with mixing times of (a) 50, (b) 100, (c) 200 (d) 300 and (e) 400 ms. (f) Integrals of the  $T_2$ - $T_2$  peaks as a function of mixing time. Square, circle and triangle correspond to integrals of aggregate, free ion and exchange peaks, respectively. Solid lines represent a fit of a two-site exchange model. (g) Zoom-in to the smaller integrals.
